# Supplementary material
Source: MDPI journal article supplement (https://www.mdpi.com/2077-1312/10/8/1106)
Supplement: s1 [file s1 › jmse-1850100-supplementary.pdf]

## Supplementary Material: Impacts of Warming and Acidification on Coral Calcification Linked to Photosymbiont Loss and Deregulation of Calcifying Fluid pH

Louise P. Cameron, Claire E. Reymond, Jelle Bijma, Janina V. Büscher, Dirk De Beer, Maxence Guillermic, Robert A. Eagle, John Gunnell, Fiona Müller-Lundin, Gertraud M. Schmidt-Grieb, Isaac Westfield, Hildegard Westphal and Justin B. Ries

Section S1. Summary of experimental design and results

Section S2. Water quality methods and summary tables

Section S3. Buoyant weight methods

Section S4. Images of calcein dye incorporation into coral skeleton

Section S5. Method for estimating photosymbiont index

Section S6. Model summary tables

### Section S1. Summary of experimental design and results

**Table S1.** Summary of the results of an experiment investigating the impacts of ocean acidification and warming on three tropical corals (60-days: *Stylophora pistillata*, *Pocillopora damicornis*, and *Seriatopora hystrix*) and one cold water coral (30-days: *Lophelia pertusa*). N = number of coral fragments per treatment at the start of the experiment, N<sub>END</sub> = the number of coral fragments per treatment at the end of the experiment once corals that died were removed. All results are reported as the mean  $\pm$  the standard deviation. Calcification rate, calcifying fluid pH, and color score were calculated for individuals that survived the full length of the experiment. NA\* indicates that values are missing due to coral mortality, and NA<sup>†</sup> indicates measurements that were not taken in certain species.

| pCO <sub>2</sub> treatment | Temperature treatment | Species              | N  | N <sub>end</sub> | Mortality (%) | Buoyant wt start (g)    | Dry wt start (g)         | Dry wt end (g)           | Calcification (% dry wt/day) | pH <sub>CF</sub>        | Color score             |
|----------------------------|-----------------------|----------------------|----|------------------|---------------|-------------------------|--------------------------|--------------------------|------------------------------|-------------------------|-------------------------|
| Ambient                    | Ambient               | <i>S. pistillata</i> | 10 | 5                | 50            | 1.783<br>$\pm$<br>0.353 | 10.918<br>$\pm$<br>0.690 | 11.010<br>$\pm$<br>0.758 | 0.013<br>$\pm$<br>0.012      | 8.825<br>$\pm$<br>0.168 | 4.691<br>$\pm$<br>0.198 |
|                            |                       | <i>P. damicornis</i> | 9  | 9                | 0             | 5.137<br>$\pm$<br>1.973 | 17.070<br>$\pm$<br>3.318 | 17.289<br>$\pm$<br>3.448 | 0.020<br>$\pm$<br>0.016      | 8.936<br>$\pm$<br>0.517 | 4.529<br>$\pm$<br>0.945 |
|                            |                       | <i>S. hystrix</i>    | 11 | 8                | 27            | 1.424<br>$\pm$<br>0.409 | 10.874<br>$\pm$<br>0.702 | 11.010<br>$\pm$<br>0.758 | 0.049<br>$\pm$<br>0.015      | 8.522<br>$\pm$<br>0.298 | 3.678<br>$\pm$<br>0.197 |
|                            |                       | <i>L. pertusa</i>    | 8  | 8                | 0             | 7.411<br>$\pm$<br>2.775 | 11.654<br>$\pm$<br>4.363 | 11.676<br>$\pm$<br>4.372 | 0.006<br>$\pm$<br>0.006      | 9.080<br>$\pm$<br>0.458 | NA <sup>†</sup>         |

|          |         |                      |    |    |     |                     |                       |                       |                      |                     |                     |
|----------|---------|----------------------|----|----|-----|---------------------|-----------------------|-----------------------|----------------------|---------------------|---------------------|
|          | High    | <i>S. pistillata</i> | 11 | 6  | 45  | 3.549<br>±<br>5.041 | 11.664<br>±<br>1.646  | 11.679<br>±<br>1.663  | 0.002<br>±<br>0.005  | 8.657<br>±<br>0.251 | 3.669<br>±<br>0.505 |
|          |         | <i>P. damicornis</i> | 10 | 0  | 100 | 3.135<br>±<br>1.799 | NA*                   | NA*                   | NA*                  | NA <sup>†</sup> *   | NA*                 |
|          |         | <i>S. hystrix</i>    | 8  | 8  | 0   | 1.415<br>±<br>0.633 | 10.859<br>±<br>1.088  | 10.75<br>±<br>1.124   | 0.018<br>±<br>0.006  | NA <sup>†</sup>     | 4.117<br>±<br>0.241 |
|          |         | <i>L. pertusa</i>    | 8  | 8  | 0   | 8.479<br>±<br>3.662 | 13.357<br>±<br>7.119  | 13.361<br>±<br>7.103  | 0.001<br>±<br>0.004  | NA <sup>†</sup>     | NA <sup>†</sup>     |
| Moderate | Ambient | <i>S. pistillata</i> | 13 | 13 | 0   | 2.320<br>±<br>1.204 | 12.077<br>±<br>2.254  | 12.383<br>±<br>2.547  | 0.037<br>±<br>0.039  | 8.594<br>±<br>0.317 | 5.005<br>±<br>0.377 |
|          |         | <i>P. damicornis</i> | 8  | 8  | 0   | 3.115<br>±<br>2.308 | 13.670<br>±<br>3.881  | 13.872<br>±<br>3.879  | 0.025<br>±<br>0.010  | 8.556<br>±<br>0.450 | 5.447<br>±<br>0.408 |
|          |         | <i>S. hystrix</i>    | 9  | 8  | 11  | 1.287<br>±<br>0.396 | 10.851<br>±<br>0.758  | 10.875<br>±<br>0.763  | 0.032<br>±<br>0.015  | 8.262<br>±<br>0.163 | 3.276<br>±<br>0.216 |
|          |         | <i>L. pertusa</i>    | 9  | 9  | 0   | 8.337<br>±<br>2.735 | 13.110<br>±<br>4.301  | 13.112<br>±<br>14.288 | 0.002<br>±<br>0.006  | 7.962<br>±<br>0.104 | NA <sup>†</sup>     |
|          | High    | <i>S. pistillata</i> | 10 | 7  | 30  | 2.270<br>±<br>0.922 | 11.505<br>±<br>1.262  | 11.560<br>±<br>1.304  | 0.008<br>±<br>0.007  | 8.164<br>±<br>0.061 | 4.409<br>±<br>0.340 |
|          |         | <i>P. damicornis</i> | 18 | 4  | 78  | 2.522<br>±<br>1.126 | 11.827<br>±<br>1.091  | 11.874<br>±<br>1.153  | 0.006<br>±<br>0.008  | NA <sup>†</sup>     | 4.080<br>±<br>0.100 |
|          |         | <i>S. hystrix</i>    | 8  | 6  | 25  | 1.146<br>±<br>0.445 | 10.046<br>±<br>0.269  | 10.153<br>±<br>0.265  | 0.019<br>±<br>0.008  | NA <sup>†</sup>     | 4.065<br>±<br>0.267 |
|          |         | <i>L. pertusa</i>    | 7  | 5  | 29  | 8.454<br>±<br>2.089 | 12.101<br>±<br>2.214  | 12.123<br>±<br>2.246  | 0.005<br>±<br>0.008  | NA <sup>†</sup>     | NA <sup>†</sup>     |
| High     | Ambient | <i>S. pistillata</i> | 10 | 10 | 0   | 1.721<br>±<br>0.396 | 10.954<br>±<br>0.742  | 11.788<br>±<br>0.918  | 0.124<br>±<br>0.043  | 8.395<br>±<br>0.304 | 5.663<br>±<br>0.119 |
|          |         | <i>P. damicornis</i> | 9  | 8  | 11  | 3.692<br>±<br>2.471 | 14.640<br>±<br>4.156  | 15.380<br>±<br>4.616  | 0.065<br>±<br>0.022  | 8.240<br>±<br>0.374 | 5.651<br>±<br>0.314 |
|          |         | <i>S. hystrix</i>    | 8  | 5  | 38  | 1.283<br>±<br>0.367 | 10.689<br>±<br>0.659  | 11.480<br>±<br>0.784  | 0.128<br>±<br>0.178  | 7.906<br>±<br>0.267 | 4.444<br>±<br>0.229 |
|          |         | <i>L. pertusa</i>    | 8  | 8  | 0   | 7.401<br>±<br>3.057 | 11.639<br>±<br>4.807  | 11.496<br>±<br>4.728  | -0.036<br>±<br>0.012 | 7.537<br>±<br>0.015 | NA <sup>†</sup>     |
|          | High    | <i>S. pistillata</i> | 11 | 11 | 0   | 2.200<br>±<br>0.444 | 11.807<br>±<br>0.858  | 11.904<br>±<br>0.929  | 0.014<br>±<br>0.018  | 7.970<br>±<br>0.194 | 4.997<br>±<br>0.233 |
|          |         | <i>P. damicornis</i> | 9  | 4  | 56  | 6.455<br>±<br>5.133 | 22.237<br>±<br>11.836 | 22.219<br>±<br>11.840 | -0.002<br>±<br>0.010 | NA <sup>†</sup>     | 4.877<br>±<br>0.264 |
|          |         | <i>S. hystrix</i>    | 8  | 3  | 63  | 1.223<br>±<br>0.389 | 10.860<br>±<br>0.642  | 10.919<br>±<br>0.626  | 0.010<br>±<br>0.005  | NA <sup>†</sup>     | 3.789<br>±<br>0.096 |
|          |         | <i>L. pertusa</i>    | 7  | 7  | 0   | 7.194<br>±<br>3.298 | 11.313<br>±<br>5.186  | 11.232<br>±<br>5.148  | -0.022<br>±<br>0.008 | NA <sup>†</sup>     | NA <sup>†</sup>     |

## Section S2. Water quality methods and summary tables

Temperature, pH, and salinity of all replicate tanks were measured three times per week using a multi-electrode probe (WTW Multi 3430 Set K). The pH electrode was calibrated prior to use at each treatment temperature with pH 4.00 and 7.00 NBS buffers traceable to NIST standard reference material. The conductivity (salinity) probe was calibrated at each treatment temperature with certified seawater reference material of 33.347 salinity (Dickson CRM batch #154). Samples for the analysis of dissolved inorganic carbon (DIC) and total alkalinity (TA) were collected weekly at midday, and used to calculate other carbonate system parameters using the program *CO<sub>2</sub>SYS*<sup>31</sup>. Samples for the analysis of DIC and TA were collected in 25 mL borosilicate glass vials sealed with rubber septae and in 50 mL polypropylene centrifuge tubes, respectively. After collection, DIC and TA samples were poisoned with 10  $\mu$ m and 20  $\mu$ m, respectively, of saturated HgCl<sub>2</sub> solution and refrigerated until analysis. Total alkalinity was determined by open-cell potentiometric Gran titration (precision = 10  $\mu$ mol/kg), and DIC was determined by coulometry using a Shimadzu DIC analyzer (precision = 10  $\mu$ mol/kg), with both analytical systems calibrated with certified seawater reference material (Dickson CRM batch #154). Seawater pCO<sub>2</sub>, pH (seawater scale), carbonate ion concentration ([CO<sub>3</sub><sup>2-</sup>]), bicarbonate ion concentration ([HCO<sub>3</sub><sup>-</sup>]), aqueous CO<sub>2</sub>, and calcite saturation state ( $\Omega_c$ ) were calculated from measured TA and DIC with the program *CO<sub>2</sub>SYS*<sup>31</sup>, using Roy et al. (1993)<sup>32</sup> values for the K<sub>1</sub> and K<sub>2</sub> carbonic acid constants, the Mucci (1983)<sup>33</sup> value for the stoichiometric calcite solubility product, and an atmospheric pressure of 1.015 atm (Tables S1 and S2). Samples for the measurement of nutrient concentrations ([NO<sub>3</sub><sup>-</sup>], [PO<sub>4</sub><sup>3-</sup>], and [NH<sub>4</sub><sup>+</sup>]) were obtained weekly

from the sumps and analyzed with a *TECAN F200 Pro* photometric fluorometric plate reader (Table S2 and Table S3).

**Table S2.** Average measured nutrients from tropical coral experiment (nitrate ( $\text{NO}_3^-$ ), phosphate ( $\text{PO}_4^{3-}$ ), and ammonium ( $\text{NH}_4^+$ ). ‘SE’ is standard error; ‘n’ is number of observations.

|                    |        | Control pCO <sub>2</sub> |             | Moderate pCO <sub>2</sub> |             | High pCO <sub>2</sub> |             |
|--------------------|--------|--------------------------|-------------|---------------------------|-------------|-----------------------|-------------|
|                    |        | 28 °C                    | 31 °C       | 28 °C                     | 31 °C       | 28 °C                 | 31 °C       |
| $\text{NO}_3^-$    | μmol/L | 2.72                     | 1.47        | 1.11                      | 2.23        | 1.49                  | 1.98        |
|                    | SE     | 1.63                     | 1.02        | 0.99                      | 1.41        | 1.04                  | 1.18        |
|                    | Range  | 0.00 - 10.55             | 0.00 - 8.33 | 0.00 - 8.00               | 0.00 - 8.82 | 0.00 - 8.33           | 0.00 - 7.40 |
|                    | n      | 8                        | 8           | 8                         | 8           | 8                     | 8           |
| $\text{PO}_4^{3-}$ | μmol/L | 0.48                     | 0.27        | 0.19                      | 0.19        | 0.12                  | 0.14        |
|                    | SE     | 0.21                     | 0.08        | 0.04                      | 0.03        | 0.02                  | 0.02        |
|                    | Range  | 0.07 - 1.87              | 0.08 - 0.81 | 0.07 - 0.41               | 0.09 - 0.32 | 0.07 - 0.19           | 0.07 - 0.23 |
|                    | n      | 8                        | 8           | 8                         | 8           | 8                     | 8           |
| $\text{NH}_4^+$    | μmol/L | 0.74                     | 0.40        | 0.12                      | 0.22        | 0.28                  | 0.16        |
|                    | SE     | 0.53                     | 0.28        | 0.10                      | 0.21        | 0.17                  | 0.10        |
|                    | Range  | 0.00 - 3.66              | 0.00 - 1.94 | 0.00 - 0.67               | 0.00 - 1.49 | 0.00 - 0.93           | 0.00 - 0.55 |
|                    | n      | 7                        | 7           | 7                         | 7           | 7                     | 6           |

**Table S3.** Average measured seawater nutrients from *Lophelia pertusa* tanks (nitrate ( $\text{NO}_3^-$ ), phosphate ( $\text{PO}_4^{3-}$ ), and ammonium ( $\text{NH}_4^+$ ). ‘SE’ is standard error; ‘n’ is number of observations.

|                    |        | Control pCO <sub>2</sub> |               | Moderate pCO <sub>2</sub> |               | High pCO <sub>2</sub> |               |
|--------------------|--------|--------------------------|---------------|---------------------------|---------------|-----------------------|---------------|
|                    |        | 9 °C                     | 12 °C         | 9 °C                      | 12 °C         | 9 °C                  | 12 °C         |
| $\text{NO}_3^-$    | μmol/L | 12.23                    | 15.41         | 12.12                     | 15.01         | 8.11                  | 10.39         |
|                    | SE     | 0.52                     | 1.29          | 0.48                      | 1.12          | 1.70                  | 2.16          |
|                    | Range  | 11.10 - 14.48            | 11.60 - 19.83 | 11.14 - 14.43             | 11.94 - 18.99 | 0.44 - 12.83          | 5.29 - 19.62  |
|                    | n      | 6                        | 6             | 6                         | 6             | 6                     | 6             |
| $\text{PO}_4^{3-}$ | μmol/L | 4.07                     | 2.79          | 4.30                      | 1.90          | 3.40                  | 2.47          |
|                    | SE     | 1.44                     | 0.85          | 1.51                      | 0.53          | 1.26                  | 0.98          |
|                    | Range  | 0.35 - 9.10              | 0.57 - 5.29   | 0.27 - 9.51               | 0.41 - 3.46   | 0.23 - 7.80           | 0.16 - 6.43   |
|                    | n      | 6                        | 6             | 6                         | 6             | 6                     | 6             |
| $\text{NH}_4^+$    | μmol/L | 34.56                    | 39.92         | 32.13                     | 37.63         | 30.14                 | 45.53         |
|                    | SE     | 17.35                    | 18.03         | 16.07                     | 17.34         | 14.68                 | 23.27         |
|                    | Range  | 0.00 - 92.16             | 0.00 - 94.00  | 0.00 - 83.69              | 0.00 - 91.74  | 0.00 - 77.47          | 0.00 - 125.08 |
|                    | n      | 5                        | 5             | 5                         | 5             | 5                     | 5             |

### Section S3. Buoyant weight methods

Coral fragments were suspended from a bottom-loading scale (*Mettler Toledo*, precision = 0.01 g) in a seawater bath of constant temperature and salinity. Coral specimens were weighed three times to obtain a mean weight, and a standard mass was measured every 5 samples to ensure that the scale was functioning properly (i.e., no instrumental drift). Buoyant weights were obtained during the first and last three days of the experiment. Immediately after the final weight was taken, corals were removed from their treatment tanks and their tissue was removed with compressed air. Coral skeletons were soaked twice in 90% ethanol to remove any salts and then dried at room temperature (20 °C) for two days. Dry skeletons were then weighed with the same scale. The relationship between the dry and buoyant weights of the coral specimens was empirically defined by plotting final dry weight against final buoyant weight (Figure S1). This relationship for each species is defined as follows:

*Stylophora pistillata*: Dry weight (g) = 1.919 x Buoyant Weight (g) + 7.677;

*Pocillopora damicornis*: Dry weight (g) = 1.662 x Buoyant Weight (g) + 8.777;

*Seriatopora hystrix*: Dry weight (g) = 1.668 x Buoyant Weight (g) + 8.493;

*Lophelia pertusa*: Dry weight (g) = 1.594 x Buoyant Weight (g) – 0.206.

where the precision of this relationship is equivalent to the standard error of the regression

(*Stylophora pistillata*: 0.060 g; *Pocillopora damicornis*: 0.053 g; *Seriatopora hystrix*: 0.068 g;

*Lophelia pertusa*: 0.023 g).

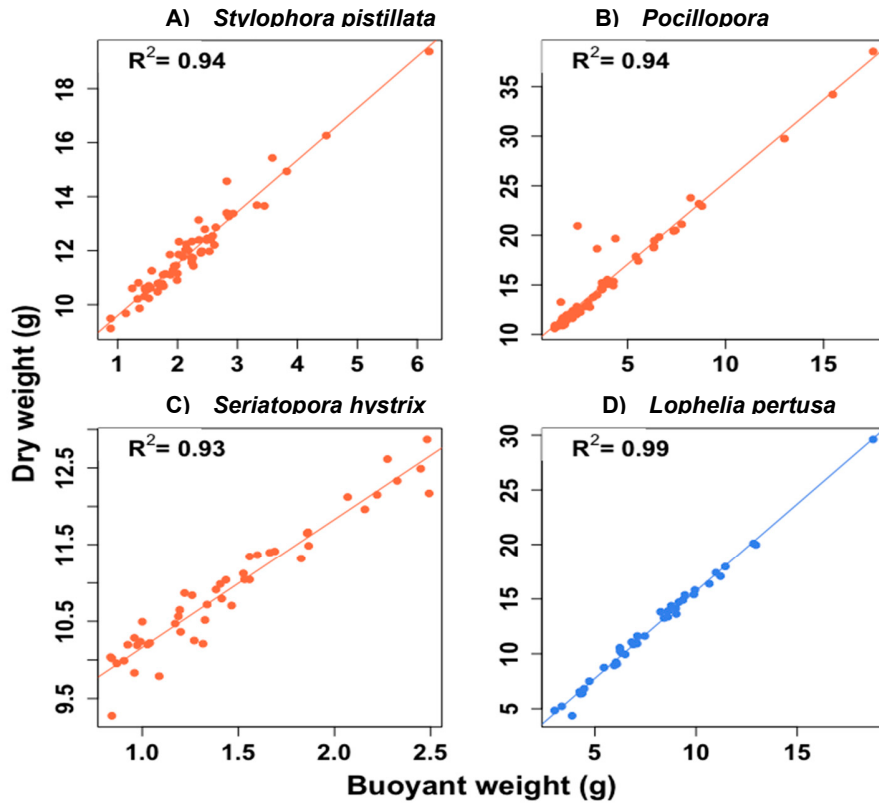

Figure S1. Scatterplots showing the significant correlations between dry and buoyant weights of three species of tropical corals (linear models, *S. pistillata*,  $p < 0.001$ ; *P. damicornis*,  $p < 0.001$ ; *S. hystrix*,  $p < 0.001$ ) and one species of cold-water coral (*L. pertusa*,  $p < 0.001$ ). These empirical relationships were used to convert buoyant weights of the coral specimens obtained at the beginning and end of the experiment to dry skeletal weights, from which net calcification rates were calculated.

These empirically derived relationships were then used to calculate dry weight at the start and end of the experiment from the buoyant weights of the coral specimens at these times. Net calcification was calculated as the difference between the final and initial dry weights of the coral specimens, which was then normalized to the initial dry weight of the specimen to control for allometric effects, thereby yielding %-calcification:

$$\% \text{-calcification} = (\text{final dry weight} - \text{initial dry weight}) / \text{initial dry weight}$$

#### Section S4. Images of calcein dye incorporation into coral skeleton

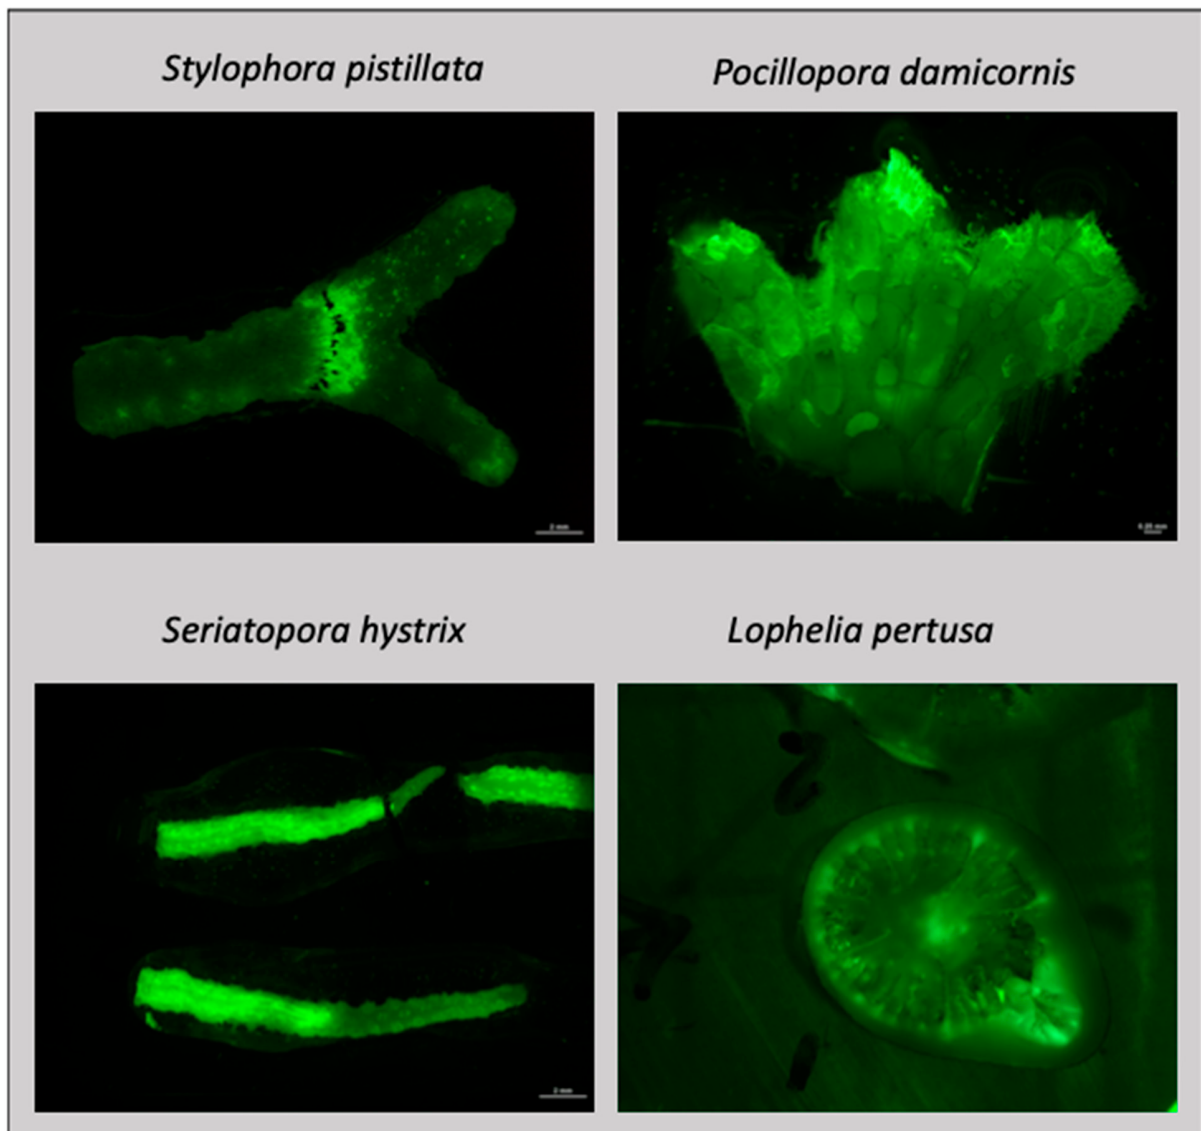

Figure S2. Photographs of the fluorescent calcein marker taken up in the skeletons of the tropical (*Stylophora pistillata*, *Pocillopora damicornis*, and *Seriatopora hystrix*) and cold-water coral specimens (*Lophelia pertusa*) at the start of the experiment, indicating the production of new skeleton during the experiment. The calcein marker was imaged using a Nikon AZ100 stereo microscope and a Nikon 96320 fluorescent filter tube.

## **Section S5. Method for estimating photosymbiont index**

The tropical coral specimens were photographed alongside the *Coral Watch Coral Health Chart* color scale (Siebeck et al., 2006) under equivalent lighting at the end of the experimental period. Relative photosymbiont abundance was estimated by extracting red-band color of the live coral tissue, then assigning each pixel value a discrete score (1-5) based on the red band of the data of the color scale.

Images were annotated using *Adobe Photoshop* (Creative Cloud 2014) to mark pixels for extraction and analysis. The color scale layer was annotated with a series of square quadrats comprising 64 black pixels on an otherwise transparent layer. The live tissue was annotated by first selecting the coral colony region using the *Adobe Powerpoint* pixel selection algorithm tool ‘Magic Wand’, then by filling the selected region of the annotation layer with black. Annotation layers were exported as separate ‘.tif’ files and read into *MatLab* (version *R2016a*) along with the photo of the specimen. Red band pixels that shared spatial indices with black pixels in the annotation layers were extracted for analysis.

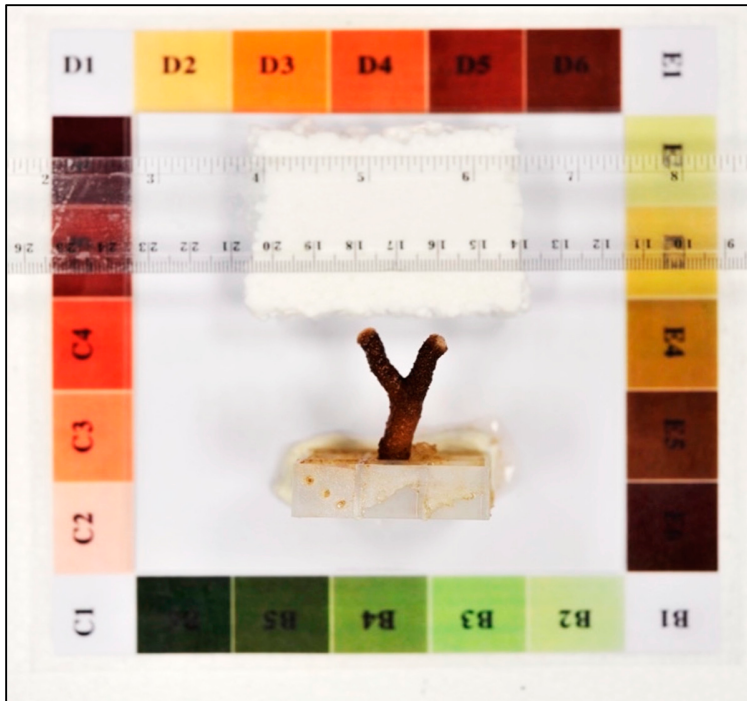

Figure S3. Sample image of the coral specimen, *Coral Watch* color scale, and spatial scale used to assign color score to the coral tissue as a proxy for photosymbiont abundance (i.e., ‘bleaching’).

Red-band pixel data for the coral colonies were then color-corrected by performing a calibration regression between the mean measured pixel data in each reference quadrat against red-band pixel data within the color scale. Hue, saturation, and brightness values for each reference color in the color scale<sup>34</sup> was converted to RGB to allow comparison using common units. Regression analysis and other calculations were carried out using the *R* statistical programming language v. 3.1.0 (R Core Team 2014). Prior to regression analysis, the pixel values were square-root transformed to correct for non-linearity. Therefore, calibration regressions took the following form:

$$\sqrt[2]{\text{Quadrat}_{\text{measured}}} \sim \hat{\beta} \sqrt[2]{\text{Quadrat}_{\text{actual}}} + \hat{\alpha}$$

The regression parameters were then algebraically rearranged and back-transformed so as to predict the corrected pixel data of the coral tissue:

$$E(\text{Pixel}_{\text{corrected}}) \sim \left[ \left( \sqrt[2]{\text{Pixel}_{\text{measured}}} - \hat{\alpha} \right) / \hat{\beta} \right]^2$$

The corrected colony pixel values were converted back to discrete bleaching scores using the same conventions as employed by the *Coral Watch* color scale. With the exception of green-hue-scale, the other three hues of color described by the reference card have the same progression of red band values associated with each bleaching score (e.g., the red band pixel data for the red, yellow, and brown categories of corals were 237, 219, 191, 150, 94, and 61 for *Coral Watch* color scores of 1 through 6, respectively). Corrected red band pixel data for the coral tissue images were discretized into the bins (i.e., color scores) described above, with bin edges defined by the midpoint between adjacent reference values. Finally, a color score for each specimen was obtained by averaging the color scores of each pixel comprising the live coral tissue image.

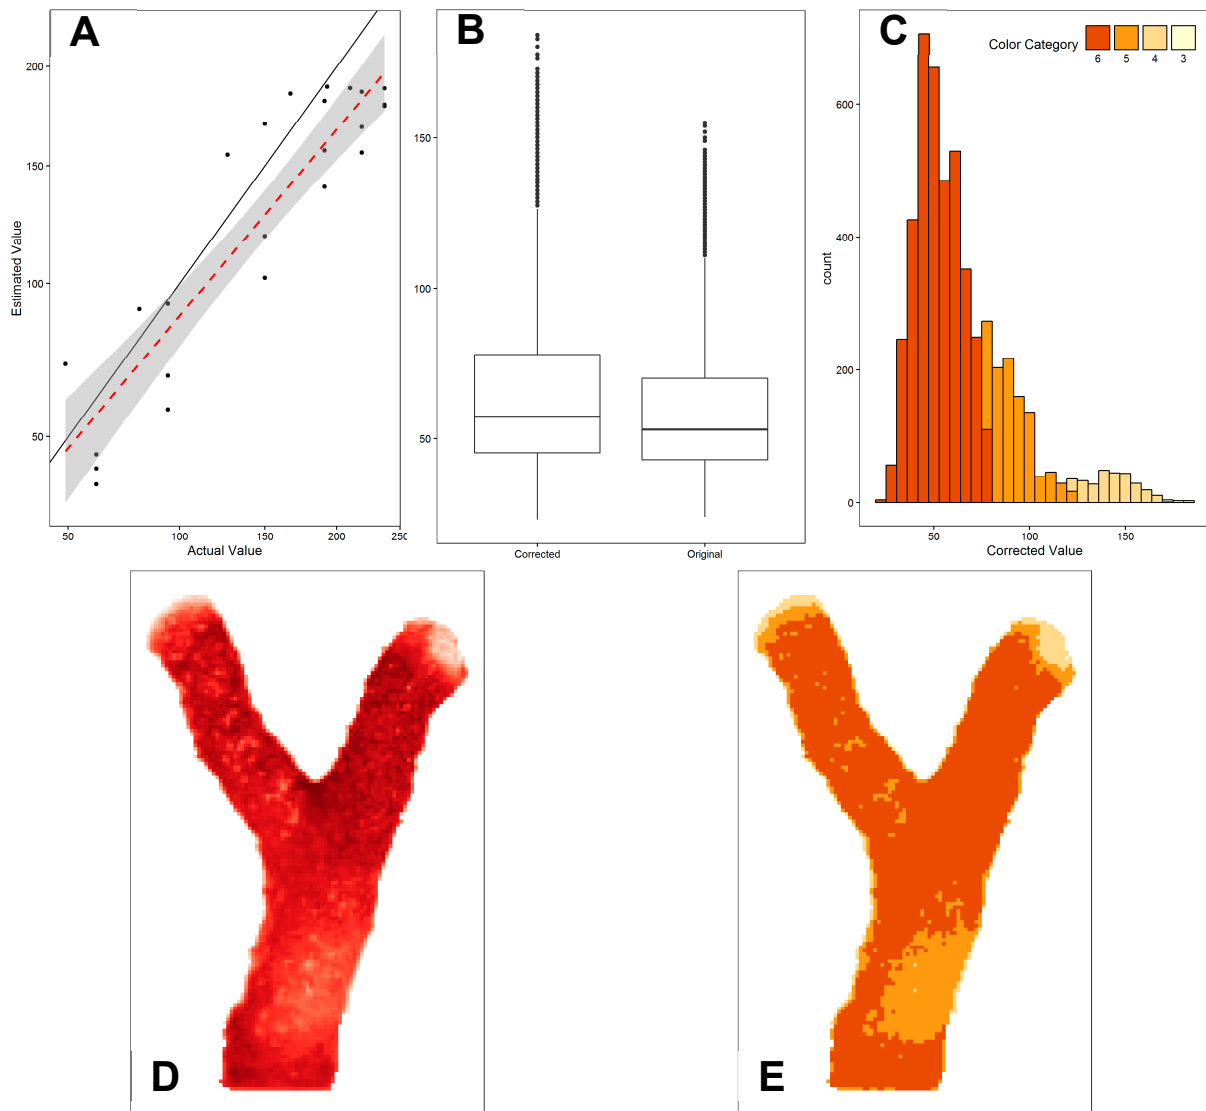

**Figure S4.** Diagnostic plots used to assign color score (as a proxy for photosymbiont abundance or ‘bleaching’) to the tissue of a *Stylophora pistillata* specimen from the control treatment. A: The calibration regression used to correct measured red band values to color values based on the standardized color card, where the regression is indicated by the red line and the 1:1 ratio is indicated by the black line. Shading indicates 95% confidence interval of the regression. Regressions were fitted on square-root-transformed values to address skewedness of higher values. B: Boxplot comparing corrected and uncorrected pixel values. C: Distribution of red band data for the imaged coral specimen, with color categories corresponding to the *Coral Watch* color scale. D: Distribution of the red band data across the coral’s surface. E: Distribution of the assigned color scores by pixel, which were averaged to calculate the color score for the coral specimen.

## Section S6. Model summary tables

**Table S4.** Table of linear mixed effects models used to investigate the impacts of pCO<sub>2</sub> and temperature on coral calcification rate. In all cases, replicate tank was included in the model as a random effect.

Models that maximized R<sup>2</sup> and minimized AIC criteria were selected for final data interpretation. Model terms, R<sup>2</sup>, and AIC values for selected models are shown in grey. If the selected model contained an interaction term, additional linear mixed effects models were run to evaluate the impact of the main effect of pCO<sub>2</sub> at each temperature level.

| Species                       | Model terms:                   | DF | R <sup>2</sup> | AIC     | p-values                                                                      |
|-------------------------------|--------------------------------|----|----------------|---------|-------------------------------------------------------------------------------|
| <i>Stylophora pistillata</i>  | pCO <sub>2</sub> x Temperature | 47 | 0.712          | 176.449 | pCO <sub>2</sub> : <0.001***<br>Temperature: 0.502<br>Interaction: <0.001***  |
|                               | pCO <sub>2</sub> + Temperature | 48 | 0.497          | 188.939 | pCO <sub>2</sub> : <0.001<br>Temperature: <0.001                              |
|                               | pCO <sub>2</sub>               | 49 | 0.155          | 214.158 | 0.003                                                                         |
|                               | Temperature                    | 49 | 0.294          | 189.224 | <0.001                                                                        |
| <i>Pocillopora damicornis</i> | pCO <sub>2</sub> x Temperature | 26 | 0.610          | 101.136 | pCO <sub>2</sub> : <0.001***<br>Temperature: 0.801<br>Interaction: 0.002**    |
|                               | pCO <sub>2</sub> + Temperature | 27 | 0.444          | 93.94   | pCO <sub>2</sub> : 0.002<br>Temperature: <0.001                               |
|                               | pCO <sub>2</sub>               | 28 | 0.114          | 107.117 | 0.069                                                                         |
|                               | Temperature                    | 28 | 0.244          | 85.825  | 0.003                                                                         |
| <i>Seriatopora hystrix</i>    | pCO <sub>2</sub> x Temperature | 31 | 0.784          | 104.193 | pCO <sub>2</sub> : <0.001***<br>Temperature: 0.642<br>Interaction: <0.001***  |
|                               | pCO <sub>2</sub> + Temperature | 32 | 0.517          | 116.318 | pCO <sub>2</sub> : <0.001<br>Temperature: <0.001                              |
|                               | pCO <sub>2</sub>               | 33 | 0.205          | 132.188 | 0.004                                                                         |
|                               | Temperature                    | 33 | 0.334          | 110.556 | <0.001                                                                        |
| <i>Lophelia pertusa</i>       | pCO <sub>2</sub> x Temperature | 34 | 0.811          | 53.962  | pCO <sub>2</sub> : <0.001***<br>Temperature: 0.081 •<br>Interaction: 0.001*** |
|                               | pCO <sub>2</sub> + Temperature | 35 | 0.748          | 45.708  | pCO <sub>2</sub> : <0.001<br>Temperature: 0.129                               |
|                               | pCO <sub>2</sub>               | 36 | 0.738          | 43.036  | <0.001                                                                        |
|                               | Temperature                    | 36 | 0.010          | 77.629  | 0.495                                                                         |

**Table S5.** Table of linear mixed effects models used to investigate the impacts of pCO<sub>2</sub> and temperature on coral calcifying fluid pH. In all cases, replicate tank was included in the model as a random effect. Models that maximized R<sup>2</sup> and minimized AIC criteria were selected for final data interpretation. Model terms, R<sup>2</sup>, and AIC values for selected models are shown in grey. If the selected model contained an interaction term, additional linear mixed effects models were run to evaluate the impact of the main effect of pCO<sub>2</sub> at each temperature level.

| Species                       | Model terms:                   | DF | R <sup>2</sup> | AIC    | p-values                                                             |
|-------------------------------|--------------------------------|----|----------------|--------|----------------------------------------------------------------------|
| <i>Stylophora pistillata</i>  | pCO <sub>2</sub> x Temperature | 11 | 0.539          | 51.098 | pCO <sub>2</sub> : 0.879<br>Temperature: 0.192<br>Interaction: 0.782 |
|                               | pCO <sub>2</sub> + Temperature | 12 | 0.553          | 32.725 | pCO <sub>2</sub> : 0.007**<br>Temperature: 0.012*                    |
|                               | pCO <sub>2</sub>               | 13 | 0.346          | 34.416 | 0.01                                                                 |
|                               | Temperature                    | 13 | 0.385          | 21.044 | 0.022                                                                |
|                               |                                |    |                |        |                                                                      |
| <i>Pocillopora damicornis</i> | pCO <sub>2</sub>               | 4  | 0.743          | 33.032 | 0.038*                                                               |
| <i>Seriatopora hystrix</i>    | pCO <sub>2</sub>               | 4  | 0.527          | 26.358 | 0.041*                                                               |
| <i>Lophelia pertusa</i>       | pCO <sub>2</sub>               | 4  | 0.726          | 34.862 | 0.026*                                                               |

**Table S6.** Table of linear mixed effects models used to investigate the impacts of pCO<sub>2</sub> and temperature on Δ[H<sup>+</sup>] of the coral calcifying fluid. Models that maximized R<sup>2</sup> and minimized AIC criteria were selected for final data interpretation. Model terms, R<sup>2</sup>, and AIC values for selected models are shown in grey. If the selected model contained an interaction term, additional linear mixed effects models were run to evaluate the impact of the main effect of pCO<sub>2</sub> at each temperature level.

| Species                       | Model terms:                   | DF | R <sup>2</sup> | AIC      | p-values                                                                   |
|-------------------------------|--------------------------------|----|----------------|----------|----------------------------------------------------------------------------|
| <i>Stylophora pistillata</i>  | pCO <sub>2</sub> x Temperature | 11 | 0.925          | 1070.232 | pCO <sub>2</sub> : <0.001***<br>Temperature: 0.758<br>Interaction: 0.003** |
|                               | pCO <sub>2</sub> + Temperature | 12 | 0.843          | 1133.707 | pCO <sub>2</sub> : <0.001<br>Temperature: 0.015                            |
|                               | pCO <sub>2</sub>               | 13 | 0.773          | 1209.489 | <0.001                                                                     |
|                               | Temperature                    | 13 | 0.146          | 1217.482 | 0.381                                                                      |
|                               |                                |    |                |          |                                                                            |
| <i>Pocillopora damicornis</i> | pCO <sub>2</sub>               | 4  | 0.888          | 542.189  | 0.002**                                                                    |
| <i>Seriatopora hystrix</i>    | pCO <sub>2</sub>               | 4  | 0.697          | 543.011  | 0.013*                                                                     |
| <i>Lophelia pertusa</i>       | pCO <sub>2</sub>               | 4  | 0.877          | 534.326  | 0.002**                                                                    |

**Table S7.** Table of linear mixed effects models explored to investigate the impacts of pCO<sub>2</sub> and temperature on coral color score (as a proxy for photosymbiont abundance or ‘bleaching’). Models that maximized R<sup>2</sup> and minimized AIC criteria were selected for final data interpretation. Model terms, R<sup>2</sup>, and AIC values for selected models are shown in grey. If the selected model contained an interaction term, additional linear mixed effects models were run to evaluate the impact of the main effect of pCO<sub>2</sub> at each temperature level.

| Species                       | Model terms:                   | DF | R <sup>2</sup> | AIC     | p-values                                                                         |
|-------------------------------|--------------------------------|----|----------------|---------|----------------------------------------------------------------------------------|
| <i>Stylophora pistillata</i>  | pCO <sub>2</sub> x Temperature | 47 | 0.729          | 92.618  | pCO <sub>2</sub> : <0.001<br>Temperature: <0.001<br>Interaction: 0.759           |
|                               | pCO <sub>2</sub> + Temperature | 48 | 0.732          | 73.888  | pCO <sub>2</sub> : <0.001***<br>Temperature: <0.001***                           |
|                               | pCO <sub>2</sub>               | 49 | 0.350          | 116.308 | <0.001                                                                           |
|                               | Temperature                    | 49 | 0.305          | 104.357 | <0.001                                                                           |
| <i>Pocillopora damicornis</i> | pCO <sub>2</sub> x Temperature | 27 | 0.399          | 107.729 | pCO <sub>2</sub> : 0.004<br>Temperature: 0.091<br>Interaction: 0.873             |
|                               | pCO <sub>2</sub> + Temperature | 28 | 0.406          | 90.799  | pCO <sub>2</sub> : 0.001***<br>Temperature: 0.001***                             |
|                               | pCO <sub>2</sub>               | 29 | 0.201          | 99.303  | 0.018                                                                            |
|                               | Temperature                    | 29 | 0.160          | 83.858  | 0.021                                                                            |
| <i>Seriatopora hystrix</i>    | pCO <sub>2</sub> x Temperature | 33 | 0.535          | 65.834  | pCO <sub>2</sub> : <0.001***<br>Temperature: <0.001***<br>Interaction: <0.001*** |
|                               | pCO <sub>2</sub> + Temperature | 34 | 0.253          | 70.044  | pCO <sub>2</sub> : 0.021<br>Temperature: 0.007                                   |
|                               | pCO <sub>2</sub>               | 35 | 0.065          | 71.343  | 0.018                                                                            |
|                               | Temperature                    | 35 | 0.184          | 58.238  | 0.060                                                                            |

Table S8. Table of linear mixed effects models explored to investigate the correlation between coral color score and calcification rate. Color score is a proxy for photosymbiont abundance (‘bleaching’) based on measurement of red band signal within coral tissue at the end of the 62-day experimental period relative to the *Coral Watch* color scale, where 0 = bleached and 6 = healthy. Models that maximized  $R^2$  and minimized AIC criteria were selected for final data interpretation. Model terms,  $R^2$ , and AIC values for selected models are shown in grey. If the selected model contained an interaction term, additional linear mixed effects models were run to evaluate the impact of the main effect of pCO<sub>2</sub> at each temperature level.

| Species                       | Model terms:                           | DF | R <sup>2</sup> | AIC     | p-values                                                                                                                                                                                                                     |
|-------------------------------|----------------------------------------|----|----------------|---------|------------------------------------------------------------------------------------------------------------------------------------------------------------------------------------------------------------------------------|
| <i>Stylophora pistillata</i>  | Color x pCO <sub>2</sub> x Temperature | 43 | 0.727          | 204.483 | Color: 0.049<br>pCO <sub>2</sub> : 0.264<br>Temperature: 0.076<br>Color x Temperature: 0.089<br>Color x pCO <sub>2</sub> : 0.367<br>Temperature x pCO <sub>2</sub> : 0.241<br>Color x Temperature x pCO <sub>2</sub> : 0.324 |
|                               | Color x pCO <sub>2</sub> + Temperature | 46 | 0.693          | 166.068 | Color: <0.001<br>pCO <sub>2</sub> : 0.031<br>Temperature: <0.001<br>Interaction: <0.001                                                                                                                                      |
|                               | Color + Temperature + pCO <sub>2</sub> | 47 | 0.500          | 189.900 | Color: 0.354<br>pCO <sub>2</sub> : 0.003<br>Temperature: 0.041                                                                                                                                                               |
|                               | Color + pCO <sub>2</sub>               | 48 | 0.413          | 197.116 | Color: <0.001<br>pCO <sub>2</sub> : 0.903                                                                                                                                                                                    |
|                               | Color x Temperature                    | 47 | 0.668          | 153.340 | Color: <0.001***<br>Temperature: <0.001***<br>Interaction: <0.001***                                                                                                                                                         |
|                               | Color + Temperature                    | 48 | 0.462          | 177.190 | Color: <0.001<br>Temperature: 0.034                                                                                                                                                                                          |
|                               | Color                                  | 49 | 0.418          | 179.693 | <0.001                                                                                                                                                                                                                       |
| <i>Pocillopora damicornis</i> | Color x pCO <sub>2</sub> x Temperature | 23 | 0.727          | 219.217 | Color: 0.124<br>pCO <sub>2</sub> : 0.002<br>Temperature: 0.933<br>Color x Temperature: 0.969<br>Color x pCO <sub>2</sub> : 0.002<br>Temperature x pCO <sub>2</sub> : 0.420<br>Color x Temperature x pCO <sub>2</sub> : 0.559 |
|                               | Color x pCO <sub>2</sub> + Temperature | 26 | 0.635          | 206.850 | Color: 0.740<br>pCO <sub>2</sub> : 0.423*<br>Temperature: 0.106<br>Interaction: 0.054 •                                                                                                                                      |
|                               | Color + Temperature + pCO <sub>2</sub> | 27 | 0.500          | 196.999 | Color: 0.244<br>pCO <sub>2</sub> : 0.237<br>Temperature: 0.563                                                                                                                                                               |
|                               | Color + pCO <sub>2</sub>               | 27 | 0.602          | 210.838 | Color: 0.760<br>pCO <sub>2</sub> : 0.272                                                                                                                                                                                     |
|                               | Color x pCO <sub>2</sub>               | 28 | 0.413          | 198.242 | Color: 0.760<br>Temperature: 0.184<br>Interaction: 0.221                                                                                                                                                                     |
|                               | Color                                  | 29 | 0.418          | 184.320 | 0.520                                                                                                                                                                                                                        |
| <i>Seriatopora hystrix</i>    | Color x pCO <sub>2</sub> x Temperature | 29 | 0.214          | 231.261 | Color: 0.974<br>pCO <sub>2</sub> : 0.718<br>Temperature: 0.954<br>Color x Temperature: 0.976<br>Color x pCO <sub>2</sub> : 0.671<br>Temperature x pCO <sub>2</sub> : 0.887<br>Color x Temperature x pCO <sub>2</sub> : 0.872 |
|                               | Color + pCO <sub>2</sub> + Temperature | 33 | 0.216          | 197.221 | Color: 0.080<br>pCO <sub>2</sub> : 0.429<br>Temperature: 0.020                                                                                                                                                               |
|                               | Color + pCO <sub>2</sub>               | 34 | 0.098          | 202.177 | Color: 0.377<br>pCO <sub>2</sub> : 0.182                                                                                                                                                                                     |
|                               | Color + Temperature                    | 34 | 0.207          | 182.010 | Color: 0.023*<br>Temperature: 0.010**                                                                                                                                                                                        |
|                               | Color                                  | 35 | 0.056          | 188.239 | 0.138                                                                                                                                                                                                                        |
